## UNSOLVED MYSTERY

# Knowns and unknowns about the neurobiology of stuttering

Nicole E. Neef<sup>1\*</sup>, Soo-Eun Chang<sup>2,3</sup>

**1** Institute for Diagnostic and Interventional Neuroradiology, University Medical Center Göttingen, Göttingen, Germany, **2** Department of Psychiatry, University of Michigan, Ann Arbor, Michigan, United States of America, **3** Department of Communication Disorders, Ewha Womans University, Seoul, Korea

\* [nicole.neef@med.uni-goettingen.de](mailto:nicole.neef@med.uni-goettingen.de)

## Abstract

Stuttering occurs in early childhood during a dynamic phase of brain and behavioral development. The latest studies examining children at ages close to this critical developmental period have identified early brain alterations that are most likely linked to stuttering, while spontaneous recovery appears related to increased inter-area connectivity. By contrast, therapy-driven improvement in adults is associated with a functional reorganization within and beyond the speech network. The etiology of stuttering, however, remains enigmatic. This Unsolved Mystery highlights critical questions and points to neuroimaging findings that could inspire future research to uncover how genetics, interacting neural hierarchies, social context, and reward circuitry contribute to the many facets of stuttering.

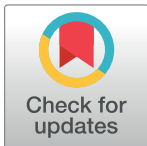

## Introduction

You are at your favorite bakery, craving a pain au chocolat. As you attempt to order, your jaw, lips, and tongue will not move and no air flows through your voice box—you struggle to get the speech sound out, but however much you try, you are frozen in place and there is no sound. You cannot answer the clerk's friendly greeting, and to your dismay you can now see that she looks uncomfortable, unsure of how to react. Looking to escape the awkward situation, you end up ordering something you do not want at all, only because it has a name that you can say without trouble. Such avoidance strategies might help for the moment, but for the person who recounted this experience, such situations have been familiar since childhood, recur continuously, and their speech impediment worsens in crucial social contexts such as during flirting, job interviews, or meetings.

Among communication disorders, stuttering is one of the most frequently occurring, far exceeding laryngeal dystonia, aphasia, and speech issues resulting from Parkinson's disease, combined [1–6]. It is a speech disorder in which speakers know exactly what they want to say and can coordinate and move their vocal organs, but intermittent loss of control occurs, where articulator movements freeze or fall into an idle loop during instances of stuttering. The overt primary symptoms are speech blocks, sound and syllable repetitions, and sound prolongations that disrupt the usual fluid, automatic process of speech production. Concomitant physical behaviors such as eye-blinking, grimacing, or extraneous limb and body movements can accompany stuttering. The covert consequences range from shame and frustration to social

## OPEN ACCESS

**Citation:** Neef NE, Chang S-E (2024) Knowns and unknowns about the neurobiology of stuttering. *PLoS Biol* 22(2): e3002492. <https://doi.org/10.1371/journal.pbio.3002492>

**Published:** February 22, 2024

**Copyright:** This is an open access article, free of all copyright, and may be freely reproduced, distributed, transmitted, modified, built upon, or otherwise used by anyone for any lawful purpose. The work is made available under the [Creative Commons CC0](https://creativecommons.org/licenses/by/4.0/) public domain dedication.

**Funding:** The author(s) received no specific funding for this work.

**Competing interests:** The authors have declared that no competing interests exist.

anxiety. Stuttering can severely limit the scope of interpersonal verbal communication and set up barriers that impact education and employment outcomes [7].

Stuttering onset occurs either abruptly or gradually during early childhood between the ages of 2 and 5 [5,6,8]. Up to 8% of preschool-age children begin to stutter and about a fifth retain lifelong stuttering [5]. Around the same developmental period of stuttering onset, children strengthen their articulatory system [9], expand their active vocabulary [10], learn to combine words into longer and more complex phrases [11], and progress in acquiring their language's typical rhythm and prosody patterns [12]. Besides speech and language development, at that age, children also acquire cognitive, social, and emotional skills to navigate through day-to-day communicative contexts. Thus, in many cases, stuttering emerges while the brain features a remarkable capacity for plasticity. Children's brain structure and function development is intricately influenced by their experiences, reactions, and interactions. This complexity poses a significant challenge in disentangling the contributions of both genetic predisposition (nature) and environmental influences (nurture) to the occurrence and remission of stuttering.

Clarification of the neurobiological basis of stuttering is made even more difficult by the fluctuation, variability, and heterogeneity of the symptoms. Specifically, stuttering is characterized by intermittency within stuttering persons and variability across the stuttering population. Within-person intermittency is reflected in the variability of symptom severity across days, weeks, and months [13,14]. Moreover, visible and audible features, and thus, overt severity of symptoms, varies with personality, social context, communicative goals, and affective state [15,16]. In addition to overt speech behaviors, persons who stutter can develop a rich spectrum of strategies to hide their stuttering, for example, by avoiding sounds or words, rephrasing utterances, or inserting interjections and starter or filler words. Like overt stuttering, the degree of covertness varies across individuals and situations. How the severity of one's own stuttering, whether overt or covert, is perceived and experienced also varies from person to person [17]. It must therefore be noted that the intermittency of stuttering, the great heterogeneity of stuttering behavior, and the individual internal experience of stuttering pose challenges for its operationalization. However, the majority of neuroimaging studies conducted thus far have primarily centered on overt stuttering as a key behavioral feature for examining brain correlates [18]. Against this background it becomes clear that our current knowledge about the neurobiological underpinnings of stuttering must be incomplete.

Considering the relative high incidence and significant psychosocial impacts, we still know relatively little about the etiology of stuttering. From a neuroscientific perspective, it is an idiopathic condition with multiple compelling characteristics—breakdown in speech motor control at its core [19,20], with severity of symptoms influenced, but not caused by, higher-order language [21], cognitive [22], or emotional processes [23]. Fundamental questions related to the nature of stuttering remain unanswered. In this Unsolved Mystery, we highlight many such questions, organized under major themes, and research advances relevant to the neurobiology of stuttering that have contributed to our understanding of this complex speech condition.

### Is stuttering genetic?

Genetic research on people who stutter has the potential to not only provide windows into key molecular–biological conditions of the disorder, but also to enhance our knowledge about the neurobiological mechanisms enabling humans to acquire and produce fluent speech. As in most cases of developmental speech and language impairments, stuttering is a rich phenotype and likely involves a complex genetic architecture that results from the inheritance of multiple risk factors with small individual influences [24,25].

The first clues for a genetic contribution were drawn from twin-based heritability studies showing that the probability for both twins to stutter is substantially higher in monozygotic than in dizygotic twins [26]. Heritability was further demonstrated by the high positive rate of family history. Approximately 50% of individuals who stutter report at least 1 additional relative who stutters, as estimated across clinically ascertained cohorts [7]. However, because the heritability is substantially less than 100%, environmental risk factors must also contribute.

The sex bias gives a further hint of a genetic contribution. Stuttering persists in 1% of the adult population, predominantly in males with a male-to-female ratio of 1:4. By contrast, at stuttering onset in early childhood, the male-to-female ratio is 1:2 [5]. As epidemiological data indicate that affected females recover more often from stuttering than affected males, it can be assumed that sex-related neurobiological factors influence the brain's capacity to recover from stuttering; however, the underlying neurodevelopmental mechanisms are unknown.

Advances in genetic sequencing enabled linkage studies in large consanguineous families with multiple affected members. In such families, stuttering has been repeatedly linked to rare variants of lysosomal targeting pathway genes (*GNPTAB*, *GNPTG*, *NAGPA*, *AP4E1*) [27,28] and further novel chromosomal loci [29,30]. These promising discoveries gave reason for more recent neuroimaging studies to explore a link between risk genes and brain structures [29,31–33]. However, although identifying variants of functional significance in co-segregation patterns of large families helps detect causality, only variation of the same risk loci in multiple unrelated individuals who stutter would establish truly functional links. A first genome-wide association study of developmental stuttering was not able to replicate previously identified loci, controverting the relevance of previously identified genes to the general population with stuttering [34]. The limited success can be explained largely by the small sample size that is insufficient for detecting single-nucleotide polymorphisms with anticipated small effects against a high background of incidental variation of individual genomes [35]. Robust associations may require tens of thousands of genotyped and phenotyped participants [25]. To overcome this significant lack of statistical power, it would be beneficial to extend clinical routines by collecting DNA samples for sequencing and including standardized cloud-based test batteries for documenting the variance in phenotypes of stuttering.

At present, new high-throughput and massively parallel DNA sequencing technologies are requiring substantially reduced costs and time than previous technologies to sequence an entire human genome. Such whole-genome sequencing has already begun to link molecular pathways that regulate gene expression during early brain development to speech and language impairments [36]. Population-level biological and clinical data may help identify clinical–molecular–biochemical subtypes of stuttering in the future.

### What are the neural markers of persistent stuttering?

When using current imaging technologies to examine the brain of an individual who stutters, it is unlikely that we will detect apparent morphological or functional anomalies. Both gray and white matter structures will appear well-formed and in their proper places in persons who stutter, and initial observations of brain waves will not appear atypical. Stuttering does not exhibit overt signs like a visible fracture in an X-ray or the clear disorganized electrical activity seen in an electrocardiogram for cardiac arrhythmia. However, the perspective shifts when comparing data from different groups of individuals. Through the lens of statistical analysis, it becomes possible to identify subtle neural deviations. More than 2 decades of brain research studies have accumulated evidence for structural and functional neural correlates of stuttering.

Both children and adults who stutter show atypical brain structure and functional patterns that can be localized and form part of a number of major neural networks. Implicated are cortical areas of the speech motor planning and control networks (Box 1), including frontal lobe

### Box 1. The vocal motor system.

Comparative studies between vocalizing vertebrates, including teleost fish, songbirds, and mammals, suggest that hierarchically organized motor pathways contribute to vocal behavior [60–64]. Together with clinical case studies, neuroimaging, and direct electrical stimulation in humans, respective findings mainly shape our current understanding of the neuroanatomy of speech. Transcallosal and cortico–cortical connections between speech motor, auditory, and somatosensory areas, cortico–thalamo–cortical loops via the basal ganglia, and cerebello–thalamo–basal ganglia pathways are believed to have a crucial role in supporting speech learning and automatization [60,65–68], particularly within a critical sensorimotor learning period. The automatization of chunked speech motor sequence output might engage synapses between the premotor and motor cortex [60,65]. Ultimately, within the mature vocal speech system, a set of left ventrolateral and dorsomedial frontal brain areas are key to the volitional initiation of speech [61,69,70], propagating their output towards orofacial and respiratory motor neurons in the brainstem to drive our speech organs (Fig 1). Fig 1 Box 1—The vocal motor system.

Besides a volitional articulatory motor network (Fig 1), marked with purple colors in the image, a primary vocal motor network (Fig 1), marked with deep magenta colors in the image, runs from the anterior cingulate cortex via the periaqueductal gray into the reticular formation of pons and medulla oblongata, and from there to the orofacial and laryngeal motoneurons [61,68,71]. The anterior cingulate cortex and the periaqueductal gray receive input from limbic brain structures including the amygdala, bed nucleus of the striata terminalis, and lateral hypothalamus [71,72]. The periaqueductal gray seems to control the readiness to vocalize in nonhuman primates and to gate social and playfulness vocalization in rodents [73,74]. The anterior cingulate cortex is well positioned to integrate cognition, emotion, and action. Its electrical stimulation in humans elicits facial displays, interoceptive sensations, autonomic responses, and laughter and smiling display, indicating that it may orchestrate social emotional behavior [75].

Human speech is based on a considerably broader array of brain regions, and the intricate network of connections within the human connectome is notably more extensive. Depicted brain regions and circuits (Fig 1) constitute core actors in the machinery of vocal speech production, and while all depicted components of the volitional articulatory motor network have been associated with stuttering, components of the primary vocal motor network also seem to be involved, including the anterior cingulate cortex, amygdala, and orbitofrontal cortex.

Abbreviations: Ac, nucleus accumbens; ACC, anterior cingulate cortex; Amy, amygdala; BNST, bed nucleus of the stria terminalis; Cau, caudate nucleus; Cb, cerebellum; DN, dentate nucleus; Gpe, globus pallidus external segment; Gpi, globus pallidus internal segment; Hip, hippocampus; IFG, inferior frontal gyrus; lat Hypoth, lateral hypothalamus; MN, vocal tract motor neurons; pIFS, posterior inferior frontal sulcus; PMC, premotor cortex; MC, primary motor cortex; OFC, orbitofrontal cortex; PAG, periaqueductal gray; PN, pontine nuclei; RF, reticular formation, specifically the lateral reticular formation and the nucleus retroambiguus; SC, primary somatosensory cortex; SMA, supplementary motor area; SMG, supramarginal gyrus; STG, superior temporal gyrus; Thal, Thalamus; vPMC, ventral premotor cortex.

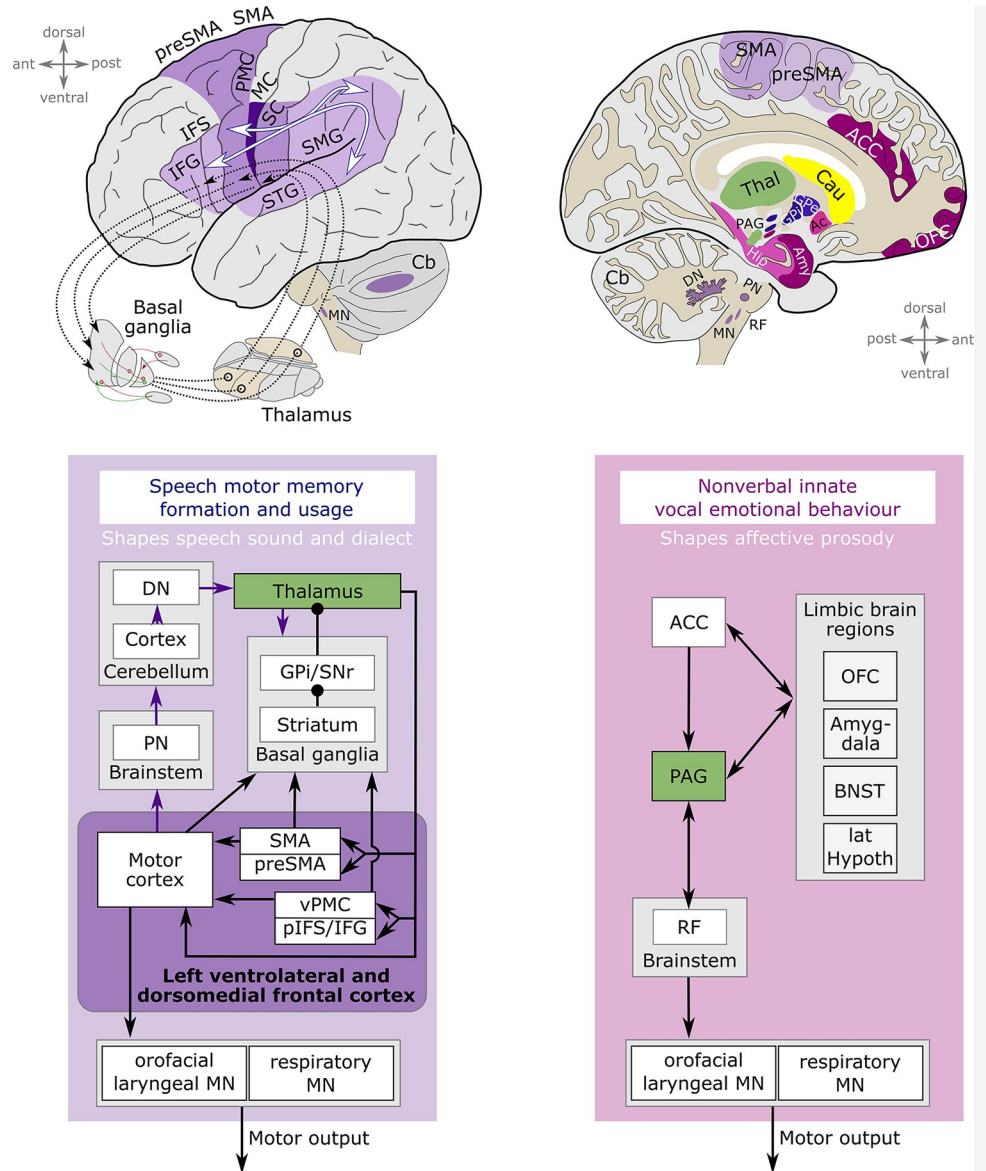

**Fig 1. Box 1—The vocal motor system.**

<https://doi.org/10.1371/journal.pbio.3002492.g001>

regions such as the motor cortex, premotor cortex, inferior frontal gyrus, frontal operculum, insular cortex, and presupplementary and supplementary motor areas [37–39]. Also implicated are parietal and temporal perisylvian regions, such as the supramarginal gyrus, and higher order auditory regions, which might be related to differences in sensorimotor integration and feedback control [37,38,40]. Furthermore, subcortical structures such as the basal ganglia, thalamus, and cerebellum are implicated, which may relate to differences in learning, initiation, timing, sequencing, and error monitoring functions [37,38,41–45]. Morphological differences in limbic brain regions involved in reward processing and emotion regulation, such as the nucleus accumbens and amygdala are associated with persistent stuttering [46–48].

Along with dysfunctional gray matter regions, alterations have also been reported for white matter structures, including the arcuate fasciculus, superior longitudinal fasciculus, frontal aslant tract, corticobulbar tracts, and cerebellar penduncles, which are responsible for transmitting information between brain regions involved in speech production and motor control [49–52]. Comprehensive reviews of both state and trait markers of stuttering have been conducted and are available in the existing literature [53–59].

Furthermore, in children with persistent stuttering, MRI techniques have shown morphological differences in cortical and subcortical motor structures, including decreases in cortical thickness in the left premotor and motor regions [76], and decreases in gray matter volume in the left ventral premotor cortex and subcortical areas, including the basal ganglia [77]. White matter structure differences have also been observed, affecting areas involved in auditory–motor integration, motor initiation, monitoring, and interhemispheric coordination [77–80]. These structural differences are correlated with stuttering severity [77], suggesting their relevance to speech fluency.

During spontaneous speech production, children with persistent stuttering exhibit decreased brain activity in the left premotor cortex and basal ganglia compared to children who do not stutter [81]. Additionally, studies indicate initial evidence of large-scale neural network connectivity differences in children with persistent stuttering, particularly involving interactions between speech motor networks and other cognitive control networks [82].

What are the most striking differences between brain abnormalities in adults and children who stutter? In contrast to children, adults frequently exhibit heightened speech-related activity and connectivity within the right hemisphere cortical structures, encompassing frontal and parietal regions, rolandic operculum, and insula [37,38,83]. This pronounced activation in the right hemisphere exceeds that of the corresponding speech-related areas in the left hemisphere [56,84,85], leading to long-standing discussions regarding its potential role as a compensatory mechanism [39,84]. The absence of a similar rightward shift in children [81] supports this proposed compensatory hypothesis. However, task-related MRI data in children are scarce, and recent studies present a more diverse perspective, suggesting that the alterations observed in the right hemisphere may represent a combination of both compensatory efforts and direct manifestations of stuttering [51,80,85].

In contrast to adults, a recent report showed that children who would go on to have persistent stuttering exhibit significantly reduced volume of the putamen early in development [77]. However, this discrepancy diminishes with age, and an intriguing paradox emerges during adulthood, where adults who stutter exhibit increased neural activity within the basal ganglia, including the putamen [86] and caudate nucleus [41]. One plausible hypothesis is that an early-occurring structural variance in the basal ganglia may initially contribute to the observed group difference, but this distinction normalizes over time due to developmental cascades influencing interconnected brain structures. For example, the structural variance in the basal ganglia early in development and its connection to the supplementary motor area may potentially exert an effect on distinct developmental trajectories in regions such as the thalamus and cerebellum. Further investigations are warranted to elucidate the precise mechanisms underlying these developmental dynamics in individuals who stutter.

Altogether, imaging findings suggest that stuttering, like other complex disorders, can be attributed to network-level disruptions [82,87–89]. Implicated networks include core hubs of speech motor skill acquisition and automatization, sensorimotor integration, feedback and error monitoring, cognition and goal-directed behavior, and limbic structures coordinating affect and social context. These networks integrate common processes implicated in verbal communication, involving multiple time scales from milliseconds for voicing features to seconds for prosodic features. Thus, fluent speech requires the neural organization of hierarchical

motor sequence representations that are stable enough to be automatically executed and at the same time flexible enough to adapt to affective, social, and goal-directed demands.

Despite the research advances reviewed in this section, answers to the following questions remain elusive. How does the critical period of speech acquisition shape interactions between speech motor learning circuits and speech motor production circuits in typically developing and stuttering children? How and when does the developing system switch between states of learning, states of automatization, and states that require monitoring via the central executive or sensory feedback control systems? What are the underlying neural circuits responsible for transitioning between pure habitual execution of speech movements and states that necessitate implementing prosodic modulations based on social context (e.g., speaking to a pet, friend, or an authority figure) and affective state (e.g., feeling pleased or angry)? How does the brain encode hierarchical speech motor sequence representations? And how is the initiation of speech motor sequences influenced by hierarchical structures or different cognitive and affective states?

### **What facilitates spontaneous recovery in children who stutter?**

Spontaneous recovery from stuttering is common in children, reported to be 80% or more [5], and neural recovery patterns may give us insights into the neural basis of fluent speech production and its pathologies. Unlike therapy-induced speech fluency learned during adulthood, spontaneous recovery during childhood results in complete alleviation of symptoms, with no effort or internal struggle to produce fluent speech. Though there are no definitive objective markers, several behavioral and demographic factors are associated with childhood recovery from stuttering. These factors include female sex, no family history of stuttering, younger age at stuttering onset, higher scores on speech sound accuracy, higher expressive and receptive language scores, and lower stuttering frequency [90,91]. Other factors, such as performance on a nonword repetition task [92] and time since stuttering onset [90,93], have also been reported.

The development of fluent speech involves learning to produce long motor sequences [65], which leads to the specialization of neural circuits that enable the effortless and fluid execution of fast and precise sequential movements [94]. Neuroimaging data, although scarce, has shown that initially, recovering children share neuroanatomical deficits with children with persistent stuttering, but these tend to normalize over time, with growth rates of white matter microstructure sometimes exceeding those observed in children who do not stutter [77,79]. Spontaneous recovery is primarily linked to age-related growth in white matter structures [77,79] that enable fast and accurate sequential speech movements. These white matter structures, including the corticospinal tract, superior longitudinal fasciculus, arcuate fasciculus, the somatomotor part of the corpus callosum, and cerebellar peduncles [77] (Fig 2, left panel), interconnect gray matter regions that showed significant reductions in volume in children with persistent stuttering, including the left ventral motor cortex and the left dorsal premotor cortex [76]. Recovery might require a better interareal connectivity within the speech network, a level of brain development that children with stuttering persistence do not achieve.

In addition to neuroplasticity in subcortical white matter structures, spontaneous recovery was linked with left ventral premotor cortex volume measures that were intermediate between those of children who do not stutter (controls) and children who stutter persistently [77], and with less gyrification in premotor medial areas with age, including in the presupplementary motor area and the supplementary motor area [76]. Animal studies suggest that synapses between the premotor and motor cortex in particular might support the learning of automatized chunked motor sequence output [60,104]. Spontaneous recovery could be based on a

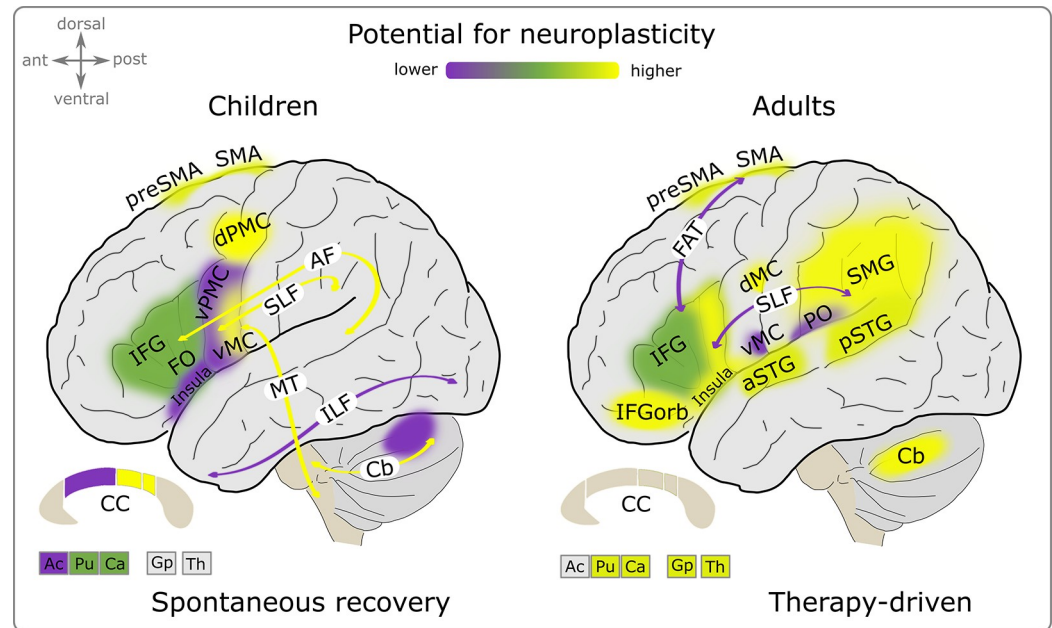

**Fig 2. Brain regions exhibiting neuroplasticity and reorganization associated with spontaneous recovery from stuttering and therapy-induced improvements.** Colored areas display key cortical brain structures and arrows illustrate fiber connections involved in stuttering and its remission. Notably, spontaneous recovery in children shows a subcortical-to-cortical structural neuroplasticity gradient [76,77,79], whereas therapy-driven improvement in adults reveals functional reorganization within and beyond the speech network [40,45,48,95–103]. Yellow areas indicate greater reorganization potential, while green areas indicate medium potential, and purple areas indicate lesser potential. The purple areas in the panel for children indicate brain structures where the volume reduction was negatively correlated with the severity of stuttering in children with persistent stuttering, while the growth rate did not change or even reversed in children with spontaneous recovery [77]. Noticeably, this is a simplified illustration; reorganization potential depends on various factors and evidence levels vary for the individual brain regions. Abbreviations: Ac, nucleus accumbens; AF, arcuate fasciculus; aSTG, anterior superior temporal gyrus; Ca, caudate nucleus; Cb, cerebellum; CC, corpus callosum; dMC, dorsal primary motor cortex; dPMC, dorsal premotor cortex; FAT, frontal aslant tract; FO, frontal operculum; Gp, globus pallidus; IFG, inferior frontal gyrus; ILF, inferior longitudinal fasciculus; IFGorb, inferior frontal gyrus pars orbitalis; MT, motor tracts; pSTG, posterior superior temporal gyrus; PO, parietal operculum; Pu, putamen; SLF, superior longitudinal fasciculus; SMA, supplementary motor area, SMG, supramarginal gyrus; Th, thalamus; vPMC, ventral primary motor cortex; vPMC, ventral premotor cortex.

<https://doi.org/10.1371/journal.pbio.3002492.g002>

higher capacity of the ventral premotor cortex, which appears to be a crucial hub for the acquisition of speech motor skills [105,106]. The presupplementary motor area and the supplementary motor area process the metrical structure of the speech motor plan and its initiation [107], and less gyrification may indicate greater long-range connectivity of these regions during recovery, since sequential encoding, especially of long sequences, is not uniquely processed in the supplementary motor area, but is rather widespread throughout the cortical motor hierarchy [94].

Motor cortical dynamics are heavily modulated by the basal ganglia, a central subcortical hub where multiple motor pathways converge [108]. And in particular the putamen, an input zone to the motor arms of the basal ganglia [109], was characterized by a gray matter growth deficit in individuals with persistent stuttering at 3 to 5 years of age [77]. This deficit subsided with age, whereas older children (aged 6 to 12 years) with persistent stuttering began to show a gray matter deficit in the thalamus [77]. During motor skill learning and execution, motor cortical and thalamic inputs to the putamen have different functions. Animal studies suggest that corticostriatal projections are critical for motor skill learning while thalamostriatal projections are critical for the execution of learned skills [110]. It is tempting to speculate that the early



gray matter deficit in the putamen is related to a deficit in learning to pronounce long speech motor sequences, while the later gray matter deficit in the thalamus relates to insufficient maturation of the subcortical motor circuits that support automated execution of such long sequences. This reasoning finds support in the observation that the cases with spontaneous recovery showed typical gray matter signal in the putamen as well as the thalamus [77].

The summarized results above align with a neurocomputational model of speech sequence learning [111], suggesting ventral premotor cortex-to-ventral motor cortex connections, first, to establish speech motor sequences via basal ganglia loops, and, second, to crystalize chunked sequences via subcortical loops through the cerebellum and corticocortical connections with the presupplementary/supplementary motor area [65]. The model suggests that early in development (prior to 2 to 3 years, typically before stuttering onset), initiation of phonemes requires a relatively high-level cortical input from the presupplementary motor area to sequentially activate the proper initiation map nodes. The basal ganglia motor loop is proposed to take over the load of sequencing through the individual phonemes in the word after a period of repeated practice, thus making production more “automatic” and freeing up higher-level cortical areas such as the presupplementary motor area [65]. According to this view, stuttering can be interpreted as an impairment of the cortico–basal ganglia loop’s role in initiation and sequencing of learned speech sequences. It is interesting that in the context of this model, the earliest occurring neural structural difference for persistent stuttering in children was in the striatum and white matter, associated with tracts that interconnect it with multiple cortical areas including premotor regions [77]. Persistent stuttering was also associated with later occurring differences in the thalamus and cerebellum. Recovery was linked to normalization of these white matter areas and greater involvement of the cerebellum. Notably, dedicated speech motor learning and automatization circuits, in particular, are implicated in stuttering recovery and persistency.

To date, longitudinal studies that have collected neuroimaging data from children who stutter are rare, and even less common are those that have examined children who recover, from the time that they are stuttering to when they eventually recover from stuttering. The limited data reported to date nevertheless facilitate emerging questions. Why does stuttering resolve in some children but not in others? What cellular and molecular mechanisms enhance or restrict the brain’s ability to develop and automate speech motor skills? Are there factors that can extend critical periods for speech motor learning? And what circumstances trigger chunking and automatization of sequences?

### **Can stuttering therapy in adulthood elicit neural reorganization?**

Stuttering therapy in adults can help speakers control stuttering, gain fluency, and facilitate quality of life, but a complete cure is rare to impossible, and relapse after a period of fluency is common. Interventional studies, although few, and often small in number, sample size and statistical power, have revealed patterns of potential functional reorganization within and beyond the speech network (Fig 2, right panel) that may inform future treatment strategies. Here, we differentiate 4 potential ways in which the brain may reorganize in response to behavioral intervention.

First, brain structures that are implicated in stuttering can be mobilized, indicating a neural response to the intervention. For example, fluency training increases cerebellar activity linked to learning new speech patterns [45]. Metronome-paced speech, coupled with transcranial electrical stimulation, can enhance activity in multiple brain areas that are associated with fluent speech, including the inferior frontal cortex (pars opercularis and orbitalis), anterior insula, anterior superior temporal gyrus, anterior cingulate cortex, and supplementary motor

area. Subcortically, activation increases in the caudate nuclei and putamen bilaterally, and in the right globus pallidus and thalamus [95]. Brain areas (cortical and subcortical motor and auditory regions) that are less active during solo speech in stutterers were more active after 8-week practice of metronome-timed speech [96]. Finally, treatment with risperidone, a dopamine receptor 2/serotonin receptor 2 antagonist, enhanced crucial brain connections for planning speech movements, namely the left putamen, caudate nucleus, and left inferior frontal cortex [97]. These treatments target the brain structures essential for smoother speech in stuttering. In this sense, the fluency-inducing interventions can “mobilize” brain activity towards fluency in speech.

Second, brain activity and connections can be normalized. Fluency-shaping, involving slow speech, gentle vocalizations, and lighter movements, can even out brain activity differences between people who stutter and those who do not. For example, excess activity in the right frontal and parietal brain areas decreased, while reduced activity in others increased to match non-stutterers [98–100]. Additionally, connections between speech-related brain regions can become more balanced [40]. This research highlights how therapy can lead to more typical brain functioning during speech.

Third, functionally maladaptive structures can become uncoupled, suggesting the adult brain’s ability to discard ineffective pathways. Specifically, after training, a hyperactive region of the midline cerebellum showed decreased connections during rest, pointing to the brain’s adaptive mechanisms in therapy-driven stuttering improvement [101].

Finally, intact speech motor learning related structures can become more strongly integrated, underscoring the adult brain’s capacity to utilize functional connections. In other words, functional speech areas that support fluent speech that may already have established connections before therapy can become more efficient in communicating among its component structures following therapy. After fluency-shaping treatment, this stronger interaction was noticed between the left inferior frontal gyrus and the left dorsal laryngeal motor cortex, as well as between the left inferior frontal gyrus and the posterior superior temporal gyrus [102]. Essentially, practicing novel speech patterns strengthened pathways that support the integration of spectro-temporal features of speech (inferior frontal gyrus to posterior superior temporal gyrus) together with pathways that support learning to implement unfamiliar patterns of prosody production and voicing (inferior frontal gyrus to dorsal laryngeal motor cortex).

As with children’s brain development, imaging is rarely used to accompany behavioral, pharmaceutical, or noninvasive brain stimulation therapies in adults who stutter. The current data, though limited, still raise pressing questions. For example, none of the studies with adults reported morphological brain changes associated with stuttering therapy, either in gray or in white matter structures. However, while neuroplasticity patterns in children mainly relate to morphological changes (activity changes have not been studied yet), neuroplasticity patterns in adults are limited to changes in brain activity. This leads us to wonder, can stuttering therapy boost neuroplasticity in critical structures to promote recovery in children? Moreover, could therapy techniques that have been used for adults (e.g., brain stimulation) be refined and elegantly combined to facilitate neuroplasticity that supports automatic, effortless fluent speech that is characteristic of spontaneous recovery?

### What are major unsolved mysteries?

We ended each of the above sections with emerging questions. Here, we further highlight outstanding questions around 3 mysteries. Why does stuttering happen when talking but not when singing? Why does stuttering occur during communicative contexts, but not in non-

communicative speech? And why do girls more often recover from stuttering than boys? Investigating the brain's biology behind these phenomena could uncover fundamental characteristics of stuttering and reveal reasons why it persists in some individuals.

### The singing advantage

Singing dramatically eliminates instances of stuttering, even in the severest cases [112,113]. During singing, relative to speaking, the temporal structure and the coordination of laryngeal and oral movements are altered (i.e., the proportion of short phonation intervals is reduced, vowel durations are lengthened [114,115], articulation rate is slowed [115,116], and articulatory voicing is stabilized [116] in individuals who stutter). Clues to why singing enhances fluency may come from an updated understanding of the neural control of the larynx. Motor control circuits for speaking and singing largely overlap [117–119], but ventral and dorsal premotor cortex/motor cortex circuits appear to be partially involved in different laryngeal functions [120]. Only the dorsal laryngeal motor cortex (LMC) is selectively engaged in the regulation of pitch (i.e., tone and melody of song and speech [121,122]; see Box 2), while both the dorsal and ventral LMCs encode articulatory voicing (for example, the laryngeal contribution to the production of voiced and voiceless consonants [121,123]). Accordingly, different computational demands of singing and speaking might tax the LMC networks' abilities in different ways and to different degrees (Box 2), so that the underlying neural dynamics could most likely also differ.

#### Box 2. Voice in song and speech

Both song and speech have characteristic melodies. Melodies are formed by modulating the pitch. Unlike melody in song, which is rather fixed (otherwise we would not recognize the melody), speech melody varies depending on the communicative context. Consider for example the words “Amazing grace, how sweet the sound.” When sung, the melody will always follow the same melodic pattern, but when spoken, very different pitch patterns can be employed to indicate, for example, excitement and pleasure by using a rising tone or irony by using a falling tone. It is not only the melody that is more fixed in singing compared to speech. Rhythm and volume dynamics also have a fixed temporal frame. Specifically, the temporal template in singing (i.e., the alignment of pitch, duration, and intensity) is precisely determined to correspond to a certain melody and rhythm, whereas in speaking, such temporal constraints are less definite or can be planned and executed more freely.

What do such contextual differences imply in terms of neural control? Despite the fact that there is considerable overlap between brain areas activated by song production and those activated by speech production [118,119], producing the melody of a song may more heavily involve auditory memory and feedback control mechanisms than speaking [117] to achieve the target auditory goal. By contrast, producing the melody in speech involve more degrees of freedom in feedforward control and a higher degree of automation than in singing [117]. Given the varying demands on the underlying neural network, it is plausible that the associated neurophysiological activity varies for singing versus speech production [117,119].

There are several muscle actions involved in raising pitch, lowering pitch, and articulatory voicing. Neural control coordinates the simultaneous adjustment of these muscles

to bring about the desired changes in the air pressure, state of the vocal folds, the height of the larynx, and consequently, the resultant fundamental frequency [124]. Neuroimaging and neurophysiological studies have identified 2 spatially separated regions in the orofacial motor cortex with activity correlated with laryngeal movements [121,123,125–127]. Direct electrical stimulation of regions in the dorsal LMC resulted in pitch modulation during word pronunciations [122], whereas articulatory voicing was mapped to separate regions in both dorsal and ventral LMCs by direct stimulation and imaging studies [121,125].

The pitch-controlling dorsal LMC is also implied in ongoing auditory feedback control during singing, as shown by studies that compare the brain activities of amateur versus professional singers when auditory feedback was perturbed by noise-masking [128] or pitch-shifting [118]. While speaking might demand less feedback control, sentence reading under delayed auditory feedback also engages the dorsal precentral gyrus (including the dorsal LMC), but not the ventral precentral gyrus [129]. In general, the dorsal LMC is involved in pitch regulation and auditory error signal processing in singing and speaking, while no such role has been found for the ventral LMC.

In sum, pitch control in song and speech differs in its demands of feedback and feedforward control mechanisms. The dorsal LMC contains neural populations that are dedicated to encoding pitch. Its activity is enhanced under heightened demands on auditory feedback control mechanisms in speech and amateur singing, while its role diminishes with automation. Song and speech differ in their degree of automation, utilization of cognitive control, reliance on auditory memory retrieval, and the extent of affective state influence. As a consequence, song and speech will induce different activation and coupling within the brain networks involving the dorsal and ventral LMCs.

The dorsal LMC supported treatment-related improvement in speech fluency in adults who stutter who participated in a fluency-shaping program [102]. The key aspect of laryngeal control in this therapy approach is that participants learn to speak with different pitch modulation [48], voicing, volume, and timing patterns [130]. At the same time, training increases the functional coupling between the left dorsal LMC and the left inferior frontal gyrus within the sensorimotor network. Since the connectivity of the functional sensorimotor network before treatment was comparable in non-stutterers and stutterers, it can be assumed that dorsal LMC function is not altered and that the enhanced dorsal LMC connectivity after treatment indicates a compensatory role [102]. This assumption is further supported by the observation that the structural network connectivity of the dorsal LMC is intact in the same cohort of individuals who stutter [103], including rich connections with the parietal cortices allowing for intricate sensorimotor coordination and modulation of voice during speech production [131]. Against this background, the phenomenon that individuals who stutter can sing without involuntary interruptions and achieve better fluency when they control phonation during fluency shaping suggests a dedicated function of the dorsal LMC in achieving fluency. Remarkably, children who recover from stuttering exhibit an increased gray matter growth rate in the dorsal premotor cortex, a region in close proximity to the dorsal LMC [76], which is involved in auditory error signal processing to maintain fluency [129] (Box 2).

In stark contrast, individuals who stutter have weakened structural connectivity of the ventral LMC [103]; a finding reminiscent of a long-standing and robust structural abnormality in stuttering [53,132,133]. Remarkably, connectivity of the ventral LMC correlates with stuttering

severity, particularly for the somatosensory cortices, inferior parietal regions, putamen, caudate nucleus, and left inferior frontal gyrus pars opercularis [103], and longitudinal data from children who continue to stutter shows reduced cortical thickness in the ventral motor cortex where the ventral LMC is located [76]. Despite ongoing research, there is persisting uncertainty regarding the specific functional contributions of the 2 laryngeal motor representations during voice production [125], and the distinct roles of dorsal and ventral LMCs in stuttering persistency and recovery remains to be verified experimentally.

Both LMCs are tightly interlinked with cortico–thalamo–cortical loops and corticocortical circuits [103,131]. Extended chains of such loops supposedly support communication across hierarchically organized cerebral networks [134,135]. This high degree of interconnectedness not only enables flexible dynamic adjustments in the temporal structure and coordination of laryngeal and oral movements during singing and speaking, but also enables differing demands on the complex interplay between sensory-guided, memory-guided, and automatic motor sequence execution. Against this background, it is promising to question how hierarchically organized circuits that align metric structures over short (speech sound voicing), medium (word accent), and long (phrasal prosody) time scales interact. Specifically, what circumstances stabilize or destabilize these hierarchies, or lead them to break down? And how do these evolving processing cascades interact with the initiation, execution, and termination of speech motor sequences?

### Social context drives stuttering

Besides the preserved ability to sing, a well-known phenomenon of interest is that stutters are fluent when speech production occurs in a nonsocial context. Overt self-talk is free from stuttering [136]. By contrast, when speech is directed to a person or audience, or serves a communicative goal, stuttering is present. The severity of symptoms varies with the communicative context and time pressure. It might be worth exploring the idea that certain social contexts increase arousal, which leads to global changes in brain activity [137], affecting motor cortical activity and vocalization [138] and causing breakdowns of the already vulnerable speech motor system of persons who stutter. And indeed, studies with songbirds suggest that subtle aspects of acoustic structures of songs that have a crucial role in social communication are influenced by the combined effects of neuromodulator systems. Involved neuromodulator systems include cholinergic, dopaminergic, serotonergic, and noradrenergic signaling [138], systems that are influenced by changes in internal state and that are part of the ascending arousal system [139]. The ascending arousal system consists of connected brainstem nuclei known as the reticular formation. Those nuclei are tightly interlinked with the innate vocalization system. This limbic vocal system includes the periaqueductal gray, lateral reticular formation, and nucleus ambiguus, structures that support and convey emotional laughing, moaning, and crying. This system is assumed to engage in shaping the emotional tone of speech prosody [62] (Box 1). In contrast to innate vocalizations that are evoked by emotional states, human speech is learned and volitional. Still, central mechanisms for the interaction between limbic and cognitively controlled vocalization pathways remain largely unknown, as are their potential interactions with stuttering. Possible open questions are: how do affect, social context, and goal-directed communication shape network formations or hierarchies of speech production circuits; is there competition between the volitional articulation motor network and the innate vocal motor network; and if so, what drives such a competition, which brain structures are involved, and to what extent might this influence stuttering? Following this line of research might facilitate the rationale for cognitive behavioral therapy approaches to help control feelings such as insecurity, anxiety, self-doubt, shame, or anger.

Beyond arousal, the social context offers significant potential to shape speech. Communication is inherently human and relies on active listening and response. This mutual exchange makes communication rewarding, driving speech motor learning through reinforcement. Successful communication and listener feedback fuel the refinement of speech skills, blending physical vocal coordination with psychological rewards. The nucleus accumbens is a striatal structure that tightly interlinks motor and limbic circuits and that is involved in the coordination of cognition, emotion and action [140], and social motivation [141], but also in active and inhibitory avoidance and reward seeking [142,143]. Notably, this region in the ventral striatum is altered in children and adults who stutter. That is, children have decreased gray matter volume in the ventral striatum that scales with stuttering severity [77], while adults have enlarged substrate in the right hemisphere [46,144]. Given these contradictory findings, it holds potential promise to inquire how reward-related brain structures and speech motor coordination structures interact in varying social contexts, and how these develop with age: for example, are there critical biological or social periods throughout the lifetime where the dynamics of supposed interactions change? Future research might disentangle whether and how limbic structures, and in particular, the nucleus accumbens, are involved in the chronic manifestation of stuttering. On the other hand, one might ask whether relevant neural circuits shape the establishment of avoidance behavior that might be related to proactive action inhibition (avoidance of certain communicative situations, words, or sounds) or reactive action inhibition (the modification of stuttering events right when they occur)? In other words, are these to be understood as part of the core deficits of stuttering, or do they reflect the mere impact of experiencing this communication disorder (i.e., related feelings when communication fails or is expected to fail, including fear, frustration, and depression)?

### Sex differences

Whether a child is a boy or a girl has significant impacts on the chances of stuttering recovery: while the male-to-female ratio is approximately 1:2 at stuttering onset in early childhood, only 1 out of 5 adults with persistent stuttering is a woman [5]. Sex effects are commonly associated with neurodevelopmental disorders, with male sex being a risk factor for childhood speech and language disorders [6,8]. It is likely that sexual dimorphisms are driven by genetic, cellular, and molecular mechanisms, and sex hormones might be a pivotal starting point to approach hypotheses. Thus, for example, prepubertal girls already have higher estradiol levels than boys, while the serum-level of this sex hormone increases with age and pubertal stage in girls and boys [145], and heavily fluctuates in girls with the menstrual cycle that starts with puberty. Changes in sex hormones might influence functional connectivity, neurotransmission, and brain structure [146]. For example, estrogen, with estradiol as its primary form during reproductive years, exhibits neurotrophic and neuroprotective properties that act on the striatum, cerebral cortex, and hippocampus [147]. Estrogen receptors colocalize with neurotransmitter pathways including the glutamatergic, dopaminergic, GABA-ergic, and serotonergic systems, and seem implicated in neurite outgrowth, synaptogenesis, dendritic branching, myelination, and other neuroplasticity mechanisms [146].

Distinct actions of estrogen on neural vocal learning and vocalization pathways have been outlined in songbirds. In certain songbird species, sexual dimorphism displays with limited to no female vocal learning. Estradiol treatment in female zebra finches revealed that the sexual dimorphism in song learning ability was established by the interaction between sex hormone signaling and sex chromosome gene expression in the song system anatomy during development [148]. Of course, one might critically ask, whether such sex-related interactions translate to human speech motor learning. Initial indications come from a pilot study with infants, 4

and 8 weeks old. At 8 weeks, their cry melody properties were correlated with serum concentrations of estradiol that varied with sex [149]. Cry melodies were analyzed with respect to frequency modulation skills, and the complexity of those melodies increased with increasing serum estradiol. This association indicates that sex hormones might influence the speech motor learning system well before puberty. Against this background, it might be reasonable to ask whether estrogen levels shape the neuroplasticity potential within the speech motor system thereby pushing girls more often towards sustained fluency.

## Conclusions

Stuttering is complex and multifaceted, with numerous open questions relevant to its neurobiological bases. This Unsolved Mystery aimed to provide an overview of the evolving science of stuttering, highlighting key unanswered questions to help stimulate discussions toward further research. Though multiple topics were discussed, we note that not all promising topics relevant to neurobiology of stuttering could be covered in this limited space. For example, examining neurophysiological aspects of stuttering using electrophysiological methods have the potential to reveal temporal dynamics of the reported cortico–basal ganglia loop function in stuttering through examining neural oscillations and synchrony of selected frequency band oscillations. Moreover, neurophysiological measures can provide insights into what happens neurologically at the time when speech fluency is interrupted. Additional topic areas that warrant further investigation include, but are not limited to: how we can address variability within the stuttering population; speech motor skill acquisition versus automatization; the role of action inhibition and the right hemisphere homologues in stuttering; hyperdirect connectivity of opercular speech network to the subthalamic nucleus [150]; and inter-hemispheric integration and corpus callosum development as they relate to stuttering persistence and recovery.

Highly relevant to the topic of singing, is the role of intrinsic timing and rhythm as they influence stuttering severity and recovery, and how they relate to the rhythm deficit hypothesis [151], which have implications for possible common, core deficits that present transdiagnostically across disparate neurodevelopmental disorders affecting speech and language function. Neural network analyses leveraging multimodal imaging data and neurocomputational modeling, as well as new discoveries of stuttering gene loci [152] could help identify the presence of neural subtypes within the stuttering population; this could lead to better targeting of interventions that are based on each individual's subtype designation. Systemic investigations into these and other questions may bring us to the cusp of breakthroughs, not only in elucidating the nature of stuttering, but also in enhanced clinical management of its core symptoms in the future.

## Author Contributions

**Conceptualization:** Nicole E. Neef, Soo-Eun Chang.

**Visualization:** Nicole E. Neef.

**Writing – original draft:** Nicole E. Neef, Soo-Eun Chang.

**Writing – review & editing:** Nicole E. Neef, Soo-Eun Chang.

## References

1. Quick Statistics About Voice, Speech, Language | NIDCD. [cited 2023 Aug 22]. Available from: <https://www.nidcd.nih.gov/health/statistics/quick-statistics-voice-speech-language>.

2. Pringsheim T, Jette N, Frolkis A, Steeves TDL. The prevalence of Parkinson's disease: A systematic review and meta-analysis. *Mov Disord*. 2014; 29:1583–1590. <https://doi.org/10.1002/mds.25945> PMID: 24976103
3. Code C, Petheram B. Delivering for aphasia. *Int J Speech-Lang Pathol*. 2011; 13:3–10. <https://doi.org/10.3109/17549507.2010.520090> PMID: 21329405
4. Simonyan K, Barkmeier-Kraemer J, Blitzer A, Hallett M, Houde JF, Kimberley TJ, et al. Laryngeal Dys-tonia: Multidisciplinary Update on Terminology, Pathophysiology, and Research Priorities. *Neurology*. 2021; 96:989–1001. <https://doi.org/10.1212/WNL.00000000000011922> PMID: 33858994
5. Yairi E, Ambrose N. Epidemiology of stuttering: 21st century advances. *J Fluency Disord*. 2013; 38:66–87. <https://doi.org/10.1016/j.jfludis.2012.11.002> PMID: 23773662
6. Sommer M, Waltersbacher A, Schlotmann A, Schröder H, Strzelczyk A. Prevalence and Therapy Rates for Stuttering, Cluttering, and Developmental Disorders of Speech and Language: Evaluation of German Health Insurance Data. *Front Hum Neurosci*. 2021; 15:645292. <https://doi.org/10.3389/fnhum.2021.645292> PMID: 33912020
7. Boyce JO, Jackson VE, Reyk O, Parker R, Vogel AP, Eising E, et al. Self-reported impact of develop-mental stuttering across the lifespan. *Dev Medicine Child Neurology*. 2022. <https://doi.org/10.1111/dmcn.15211> PMID: 35307825
8. Zablotsky B, Black LI, Maenner MJ, Schieve LA, Danielson ML, Bitsko RH, et al. Prevalence and Trends of Developmental Disabilities among Children in the United States: 2009–2017. *Pediatrics*. 2019; 144:e20190811. <https://doi.org/10.1542/peds.2019-0811> PMID: 31558576
9. McLeod S, Crowe K. Children's Consonant Acquisition in 27 Languages: A Cross-Linguistic Review. *Am J Speech-lang Pat*. 2018; 27:1546–1571. [https://doi.org/10.1044/2018\\_AJSLP-17-0100](https://doi.org/10.1044/2018_AJSLP-17-0100) PMID: 30177993
10. Rowe ML. A Longitudinal Investigation of the Role of Quantity and Quality of Child-Directed Speech in Vocabulary Development: Child-Directed Speech and Vocabulary. *Child Dev*. 2012; 83:1762–1774. <https://doi.org/10.1111/j.1467-8624.2012.01805.x> PMID: 22716950
11. Huttenlocher J, Vasilyeva M, Cymerman E, Levine S. Language input and child syntax. *Cognitive Psy-chol*. 2002; 45:337–374. [https://doi.org/10.1016/s0010-0285\(02\)00500-5](https://doi.org/10.1016/s0010-0285(02)00500-5) PMID: 12480478
12. Ballard KJ, Djaja D, Arciuli J, James DGH, van Doorn J. Developmental Trajectory for Production of Prosody: Lexical Stress Contrastivity in Children Ages 3 to 7 Years and in Adults. *J Speech Lang Hear Res*. 2012; 55:1822–1835. [https://doi.org/10.1044/1092-4388\(2012\)11-0257](https://doi.org/10.1044/1092-4388(2012)11-0257)
13. Constantino CD, Leslie P, Quesal RW, Yaruss JS. A preliminary investigation of daily variability of stut-tering in adults. *J Commun Disord*. 2016; 60:39–50. <https://doi.org/10.1016/j.jcomdis.2016.02.001> PMID: 26945438
14. Shulman E. Factors influencing the variability of stuttering. In: Johnson W, Leutenegger R, editors. *Stuttering in children and adults*. University of Minnesota Press; 1995.
15. Tichenor SE, Yaruss JS. Variability of Stuttering: Behavior and Impact. *Am J Speech-lang Pat*. 2021; 30:75–88. [https://doi.org/10.1044/2020\\_AJSLP-20-00112](https://doi.org/10.1044/2020_AJSLP-20-00112) PMID: 33197323
16. Jackson ES, Tiede M, Beal D, Whalen DH. The Impact of Social-Cognitive Stress on Speech Variabil-ity, Determinism, and Stability in Adults Who Do and Do Not Stutter. *J Speech Lang Hear Res*. 2016; 59:1295–1314. [https://doi.org/10.1044/2016\\_JSLHR-S-16-0145](https://doi.org/10.1044/2016_JSLHR-S-16-0145) PMID: 27936276
17. Sønsterud H, Howells K, Ward D. Covert and overt stuttering: Concepts and comparative findings. *J Commun Disord*. 2022; 99:106246. <https://doi.org/10.1016/j.jcomdis.2022.106246> PMID: 35858497
18. Bowers A. Will Brain Imaging Lead to a Translational Neuroscience of Stuttering? *Perspect ASHA Spéc Interes Groups*. 2023; 8:943–954. [https://doi.org/10.1044/2023\\_persp-23-00007](https://doi.org/10.1044/2023_persp-23-00007)
19. Smith A, Weber C. How Stuttering Develops: The Multifactorial Dynamic Pathways Theory. *J Speech Lang Hear Res*. 2017; 60:2483–2505. [https://doi.org/10.1044/2017\\_JSLHR-S-16-0343](https://doi.org/10.1044/2017_JSLHR-S-16-0343) PMID: 28837728
20. Ludlow CL, Loucks T. Stuttering: a dynamic motor control disorder. *J Fluency Disord*. 2004; 28:273–295. <https://doi.org/10.1016/j.jfludis.2003.07.001> PMID: 14643066
21. MacPherson MK, Smith A. Influences of Sentence Length and Syntactic Complexity on the Speech Motor Control of Children Who Stutter. *J Speech Lang Hear Res*. 2013; 56:89–102. [https://doi.org/10.1044/1092-4388\(2012\)11-0184](https://doi.org/10.1044/1092-4388(2012)11-0184) PMID: 22490621
22. Eichorn N, Pirutinsky S. Dual-Task Effects on Concurrent Speech Production in School-Age Children With and Without Stuttering Disorders. *J Speech Lang Hear Res*. 2022; 65:2144–2159. [https://doi.org/10.1044/2022\\_JSLHR-21-00426](https://doi.org/10.1044/2022_JSLHR-21-00426) PMID: 35658493
23. Alm PA. Stuttering in relation to anxiety, temperament, and personality: Review and analysis with focus on causality. *J Fluen Disord*. 2014; 40:5–21. <https://doi.org/10.1016/j.jfludis.2014.01.004> PMID: 24929463



24. Graham SA, Fisher SE. Understanding Language from a Genomic Perspective. *Annu Rev Genet.* 2015; 49:131–160. <https://doi.org/10.1146/annurev-genet-120213-092236> PMID: 26442845
25. Eising E, Mirza-Schreiber N, de Zeeuw EL, Wang CA, Truong DT, Allegri AG, et al. Genome-wide analyses of individual differences in quantitatively assessed reading- and language-related skills in up to 34,000 people. *Proc Natl Acad Sci U S A.* 2022; 119:e2202764119. <https://doi.org/10.1073/pnas.2202764119> PMID: 35998220
26. Domingues CE, Drayna D. The genetics of stuttering. *eLS.* 2015:1–8. <https://doi.org/10.1002/9780470015902.a0025254>
27. Kang C, Riazuddin S, Mundorff J, Krasnewich D, Friedman P, Mullikin JC, et al. Mutations in the Lysosomal Enzyme-Targeting Pathway and Persistent Stuttering. *New Engl J Medicine.* 2010; 362:677–685. <https://doi.org/10.1056/NEJMoa0902630> PMID: 20147709
28. Raza MH, Mattera R, Morell R, Sainz E, Rahn R, Gutierrez J, et al. Association between Rare Variants in AP4E1, a Component of Intracellular Trafficking, and Persistent Stuttering. *Am J Hum Genetics.* 2015; 97:715–725. <https://doi.org/10.1016/j.ajhg.2015.10.007> PMID: 26544806
29. Thompson-Lake DGY, Scerri TS, Block S, Turner SJ, Reilly S, Kefalianos E, et al. Atypical development of Broca's area in a large family with inherited stuttering. *Brain J Neurology.* 2022; 145:1177–1188. <https://doi.org/10.1093/brain/awab364> PMID: 35296891
30. Morgan AT, Scerri TS, Vogel AP, Reid CA, Quach M, Jackson VE, et al. Stuttering associated with a pathogenic variant in the chaperone protein cyclophilin 40. *Brain.* 2023:awad314. <https://doi.org/10.1093/brain/awad314> PMID: 37977818
31. Chow HM, Garnett EO, Li H, Etchell A, Sepulcre J, Drayna D, et al. Linking Lysosomal Enzyme Targeting Genes and Energy Metabolism with Altered Gray Matter Volume in Children with Persistent Stuttering. *Neurobiol Lang.* 2020; 1:365–380. [https://doi.org/10.1162/nol\\_a\\_00017](https://doi.org/10.1162/nol_a_00017) PMID: 34041495
32. Benito-Aragón C, Gonzalez-Sarmiento R, Liddell T, Diez I, d'Oleire UF, Ortiz-Terán L, et al. Neurofilament-lysosomal genetic intersections in the cortical network of stuttering. *Prog Neurobiol.* 2020; 184:101718. <https://doi.org/10.1016/j.pneurobio.2019.101718> PMID: 31669185
33. Chow HM, Li H, Liu S, Frigerio-Domingues C, Drayna D. Neuroanatomical anomalies associated with rare AP4E1 mutations in people who stutter. *Brain Commun.* 2021; 3:fcab266. <https://doi.org/10.1093/braincomms/fcab266> PMID: 34859215
34. Polikowsky HG, Shaw DM, Petty LE, Chen H-H, Pruett DG, Linklater JP, et al. Population-based genetic effects for developmental stuttering. *Hum Genetics Genom Adv.* 2022; 3:100073. <https://doi.org/10.1016/j.xhgg.2021.100073> PMID: 35047858
35. Deriziotis P, Fisher SE. Speech and Language: Translating the Genome. *Trends Genet.* 2017; 33:642–656. <https://doi.org/10.1016/j.tig.2017.07.002> PMID: 28781152
36. Eising E, Carrion-Castillo A, Vino A, Strand EA, Jakielski KJ, Scerri TS, et al. A set of regulatory genes co-expressed in embryonic human brain is implicated in disrupted speech development. *Mol Psychiatr.* 2019; 24:1065–1078. <https://doi.org/10.1038/s41380-018-0020-x> PMID: 29463886
37. Fox PT, Ingham RJ, Ingham JC, Hirsch TB, Downs JH, Martin C, et al. A PET study of the neural systems of stuttering. *Nature.* 1996; 382:158–162. <https://doi.org/10.1038/382158a0> PMID: 8700204
38. Watkins KE, Smith SM, Davis S, Howell P. Structural and functional abnormalities of the motor system in developmental stuttering. *Brain.* 2008; 131:50–59. <https://doi.org/10.1093/brain/awm241> PMID: 17928317
39. Preibisch C, Neumann K, Raab P, Euler HA, Wolff von Gudenberg A, Lanfermann H, et al. Evidence for compensation for stuttering by the right frontal operculum. *Neuroimage.* 2003; 20:1356–1364. [https://doi.org/10.1016/S1053-8119\(03\)00376-8](https://doi.org/10.1016/S1053-8119(03)00376-8) PMID: 14568504
40. Kell CA, Neumann K, Behrens M, Wolff von Gudenberg A, Giraud A-L. Speaking-related changes in cortical functional connectivity associated with assisted and spontaneous recovery from developmental stuttering. *J Fluency Disord.* 2018; 55:135–144. <https://doi.org/10.1016/j.jfludis.2017.02.001> PMID: 28216127
41. Giraud A-L, Neumann K, Bachoud-Levi A-C, Wolff von Gudenberg A, Euler HA, Lanfermann H, et al. Severity of dysfluency correlates with basal ganglia activity in persistent developmental stuttering. *Brain Lang.* 2008; 104:190–199. <https://doi.org/10.1016/j.bandl.2007.04.005> PMID: 17531310
42. Sitek KR, Cai S, Beal DS, Perkell JS, Guenther FH, Ghosh SS. Decreased Cerebellar-Orbitofrontal Connectivity Correlates with Stuttering Severity: Whole-Brain Functional and Structural Connectivity Associations with Persistent Developmental Stuttering. *Front Hum Neurosci.* 2016; 10:190. <https://doi.org/10.3389/fnhum.2016.00190> PMID: 27199712
43. Frankford SA, Murray ESH, Masapollo M, Cai S, Tourville JA, Nieto-Castañón A, et al. The Neural Circuitry Underlying the “Rhythm Effect” in Stuttering. *J Speech Lang Hear Res.* 2021; 64:2325–2346. [https://doi.org/10.1044/2021\\_JSLHR-20-00328](https://doi.org/10.1044/2021_JSLHR-20-00328) PMID: 33887150

44. Wu JC, Maguire G, Riley G, Lee A, Keator D, Tang C, et al. Increased dopamine activity associated with stuttering. *Neuroreport*. 1997; 8:767–770. <https://doi.org/10.1097/00001756-199702100-00037> PMID: 9106763
45. De Nil LF, Kroll RM, Houle S. Functional neuroimaging of cerebellar activation during single word reading and verb generation in stuttering and nonstuttering adults. *Neurosci Lett*. 2001; 302:77–80. [https://doi.org/10.1016/s0304-3940\(01\)01671-8](https://doi.org/10.1016/s0304-3940(01)01671-8) PMID: 11290391
46. Neef NE, Büttfering C, Auer T, Metzger FL, Euler HA, Frahm J, et al. Altered morphology of the nucleus accumbens in persistent developmental stuttering. *J Fluency Disord*. 2018; 55:84–93. <https://doi.org/10.1016/j.jfludis.2017.04.002> PMID: 28595893
47. Toyomura A, Fujii T, Yokosawa K, Kuriki S. Speech Disfluency-dependent Amygdala Activity in Adults Who Stutter: Neuroimaging of Interpersonal Communication in MRI Scanner Environment. *Neuroscience*. 2018; 374:144–154. <https://doi.org/10.1016/j.neuroscience.2018.01.037> PMID: 29378280
48. Neumann K, Euler HA, Kob M, Wolff von Gudenberg A, Giraud A-L, Weissgerber T, et al. Assisted and unassisted recession of functional anomalies associated with dysprosody in adults who stutter. *J Fluency Disord*. 2018; 55:120–134. <https://doi.org/10.1016/j.jfludis.2017.09.003> PMID: 28958627
49. Connally EL, Ward D, Howell P, Watkins KE. Disrupted white matter in language and motor tracts in developmental stuttering. *Brain Lang*. 2014; 131:25–35. <https://doi.org/10.1016/j.bandl.2013.05.013> PMID: 23819900
50. Johnson CA, Liu Y, Waller N, Chang S-E. Tract profiles of the cerebellar peduncles in children who stutter. *Brain Struct Funct*. 2022; 227:1773–1787. <https://doi.org/10.1007/s00429-022-02471-4> PMID: 35220486
51. Neef NE, Anwander A, Büttfering C, Schmidt-Samoa C, Friederici AD, Paulus W, et al. Structural connectivity of right frontal hyperactive areas scales with stuttering severity. *Brain*. 2018; 141:191–204. <https://doi.org/10.1093/brain/awx316> PMID: 29228195
52. Kronfeld-Duenias V, Amir O, Ezrati-Vinacour R, Civier O, Ben-Shachar M. The frontal aslant tract underlies speech fluency in persistent developmental stuttering. *Brain Struct Funct*. 2016; 221:365–381. <https://doi.org/10.1007/s00429-014-0912-8> PMID: 25344925
53. Neef NE, Anwander A, Friederici AD. The Neurobiological Grounding of Persistent Stuttering: from Structure to Function. *Curr Neurol Neurosci Rep*. 2015; 15:63. <https://doi.org/10.1007/s11910-015-0579-4> PMID: 26228377
54. Connally EL, Ward D, Pliatsikas C, Finnegan S, Jenkinson M, Boyles R, et al. Separation of trait and state in stuttering. *Hum Brain Mapp*. 2018; 39:3109–3126. <https://doi.org/10.1002/hbm.24063> PMID: 29624772
55. Watkins KE, Chesters J, Connally EL. The neurobiology of developmental stuttering. In: Hickok G, Small S, editors. *Neurobiology of Language*. 2016. p. 995–1004. <https://doi.org/10.1016/b978-0-12-407794-2.00079-1>
56. Budde KS, Barron DS, Fox PT. Stuttering, induced fluency, and natural fluency: A hierarchical series of activation likelihood estimation meta-analyses. *Brain Lang*. 2014; 139:99–107. <https://doi.org/10.1016/j.bandl.2014.10.002> PMID: 25463820
57. Chang S-E, Guenther FH. Involvement of the Cortico-Basal Ganglia-Thalamocortical Loop in Developmental Stuttering. *Front Psychol*. 2020; 10:3088. <https://doi.org/10.3389/fpsyg.2019.03088> PMID: 32047456
58. Craig-McQuaide A, Akram H, Zrinzo L, Tripoliti E. A review of brain circuitries involved in stuttering. *Front Hum Neurosci*. 2014; 8:884. <https://doi.org/10.3389/fnhum.2014.00884> PMID: 25452719
59. Chang S-E, Garnett EO, Etchell A, Chow HM. Functional and Neuroanatomical Bases of Developmental Stuttering: Current Insights. *Neurosci*. 2019; 25:566–582. <https://doi.org/10.1177/1073858418803594> PMID: 30264661
60. Brainard MS, Doupe AJ. Translating Birdsong: Songbirds as a Model for Basic and Applied Medical Research. *Annu Rev Neurosci*. 2013; 36:489–517. <https://doi.org/10.1146/annurev-neuro-060909-152826> PMID: 23750515
61. Nieder A, Mooney R. The neurobiology of innate, volitional and learned vocalizations in mammals and birds. *Philos Trans R Soc B*. 2020; 375:20190054. <https://doi.org/10.1098/rstb.2019.0054> PMID: 31735150
62. Ziegler W, Ackermann H. Subcortical Contributions to Motor Speech: Phylogenetic, Developmental, Clinical. *Trends Neurosci*. 2017; 40:458–468. <https://doi.org/10.1016/j.tins.2017.06.005> PMID: 28712469
63. Petkov CI, Jarvis ED. Birds, primates, and spoken language origins: behavioral phenotypes and neurobiological substrates. *Front Evol Neurosci*. 2012; 4:12. <https://doi.org/10.3389/fnevo.2012.00012> PMID: 22912615

64. Zhang YS, Ghazanfar AA. A Hierarchy of Autonomous Systems for Vocal Production. *Trends Neurosci.* 2020; 43:115–126. <https://doi.org/10.1016/j.tins.2019.12.006> PMID: 31955902
65. Meier AM, Guenther FH. Neurocomputational modeling of speech motor development. *J Child Lang.* 2023;1–18. <https://doi.org/10.1017/S0305000923000260> PMID: 37337871
66. Hull C. The cerebellum influences vocal timing. *eLife.* 2018; 7:e40447. <https://doi.org/10.7554/eLife.40447> PMID: 30152753
67. Simmonds AJ, Leech R, Iverson P, Wise RJS. The response of the anterior striatum during adult human vocal learning. *J Neurophysiol.* 2014; 112:792–801. <https://doi.org/10.1152/jn.00901.2013> PMID: 24805076
68. Jürgens U. The Neural Control of Vocalization in Mammals: A Review. *J Voice.* 2009; 23:1–10. <https://doi.org/10.1016/j.jvoice.2007.07.005> PMID: 18207362
69. Hage SR, Gavrilov N, Nieder A. Cognitive Control of Distinct Vocalizations in Rhesus Monkeys. *J Cognitive Neurosci.* 2013; 25:1692–1701. [https://doi.org/10.1162/jocn\\_a.00428](https://doi.org/10.1162/jocn_a.00428) PMID: 23691983
70. Loh KK, Procyk E, Neveu R, Lambertson F, Hopkins WD, Petrides M, et al. Cognitive control of orofacial motor and vocal responses in the ventrolateral and dorsomedial human frontal cortex. *Proc National Acad Sci U S A.* 2020; 117:4994–5005. <https://doi.org/10.1073/pnas.1916459117> PMID: 32060124
71. Jürgens U. The role of the periaqueductal grey in vocal behaviour. *Behav Brain Res.* 1994; 62:107–117. [https://doi.org/10.1016/0166-4328\(94\)90017-5](https://doi.org/10.1016/0166-4328(94)90017-5) PMID: 7945960
72. Jürgens U, von Cramon D. On the role of the anterior cingulate cortex in phonation: A case report. *Brain Lang.* 1982; 15:234–248. [https://doi.org/10.1016/0093-934x\(82\)90058-x](https://doi.org/10.1016/0093-934x(82)90058-x) PMID: 7074343
73. Tschida K, Michael V, Takatoh J, Han B-X, Zhao S, Sakurai K, et al. A Specialized Neural Circuit Gates Social Vocalizations in the Mouse. *Neuron.* 2019; 103:459–472.e4. <https://doi.org/10.1016/j.neuron.2019.05.025> PMID: 31204083
74. Gloveli N, Simonnet J, Tang W, Concha-Miranda M, Maier E, Dvorzhak A, et al. Play and tickling responses map to the lateral columns of the rat periaqueductal gray. *Neuron.* 2023. <https://doi.org/10.1016/j.neuron.2023.06.018> PMID: 37516112
75. Gerbella M, Pinardi C, Cesare GD, Rizzolatti G, Caruana F. Two Neural Networks for Laughter: A Tractography Study. *Cereb Cortex.* 2020; 31:899–916. <https://doi.org/10.1093/cercor/bhaa264> PMID: 32969467
76. Garnett EO, Chow HM, Nieto-Castañón A, Tourville JA, Guenther FH, Chang S-E. Anomalous morphology in left hemisphere motor and premotor cortex of children who stutter. *Brain.* 2018; 141:2670–2684. <https://doi.org/10.1093/brain/awy199> PMID: 30084910
77. Chow HM, Garnett EO, Koenraads SPC, Chang S-E. Brain developmental trajectories associated with childhood stuttering persistence and recovery. *Dev Cogn Neurosci.* 2023; 60:101224. <https://doi.org/10.1016/j.dcn.2023.101224> PMID: 36863188
78. Chang S-E, Zhu DC, Choo AL, Angstadt M. White matter neuroanatomical differences in young children who stutter. *Brain.* 2015; 138:694–711. <https://doi.org/10.1093/brain/awu400> PMID: 25619509
79. Chow HM, Chang S. White matter developmental trajectories associated with persistence and recovery of childhood stuttering. *Hum Brain Mapp.* 2017; 38:3345–3359. <https://doi.org/10.1002/hbm.23590> PMID: 28390149
80. Neef NE, Angstadt M, Koenraads SPC, Chang S-E. Dissecting structural connectivity of the left and right inferior frontal cortex in children who stutter. *Cereb Cortex.* 2022. <https://doi.org/10.1093/cercor/bhac328> PMID: 36057839
81. Chow HM, Garnett EO, Ratner NB, Chang S-E. Brain activity during the preparation and production of spontaneous speech in children with persistent stuttering. *NeuroImage Clin.* 2023; 38:103413. <https://doi.org/10.1016/j.nicl.2023.103413> PMID: 37099876
82. Chang S-E, Angstadt M, Chow HM, Etchell AC, Garnett EO, Choo AL, et al. Anomalous network architecture of the resting brain in children who stutter. *J Fluency Disord.* 2018; 55:46–67. <https://doi.org/10.1016/j.jfludis.2017.01.002> PMID: 28214015
83. Belyk M, Kraft SJ, Brown S. Stuttering as a trait or state—an ALE meta-analysis of neuroimaging studies. *Eur J Neurosci.* 2015; 41:275–284. <https://doi.org/10.1111/ejn.12765> PMID: 25350867
84. Braun AR, Varga M, Stager S, Schulz G, Selbie S, Maisog JM, et al. Altered patterns of cerebral activity during speech and language production in developmental stuttering. An H2(15)O positron emission tomography study. *Brain.* 1997; 120:761–784. <https://doi.org/10.1093/brain/120.5.761> PMID: 9183248
85. Neef NE, Büttfering C, Anwander A, Friederici AD, Paulus W, Sommer M. Left posterior-dorsal area 44 couples with parietal areas to promote speech fluency, while right area 44 activity promotes the

- stopping of motor responses. *Neuroimage*. 2016; 142:628–644. <https://doi.org/10.1016/j.neuroimage.2016.08.030> PMID: 27542724
86. Chang S-E, Kenney MK, Loucks TMJ, Ludlow CL. Brain activation abnormalities during speech and non-speech in stuttering speakers. *Neuroimage*. 2009; 46:201–212. <https://doi.org/10.1016/j.neuroimage.2009.01.066> PMID: 19401143
  87. Cai S, Tourville JA, Beal DS, Perkell JS, Guenther FH, Ghosh SS. Diffusion imaging of cerebral white matter in persons who stutter: evidence for network-level anomalies. *Front Hum Neurosci*. 2014; 8:54. <https://doi.org/10.3389/fnhum.2014.00054> PMID: 24611042
  88. Qiao J, Wang Z, Zhao G, Huo Y, Herder CL, Sikora CO, et al. Functional neural circuits that underlie developmental stuttering. *PLoS ONE*. 2017; 12:e0179255. <https://doi.org/10.1371/journal.pone.0179255> PMID: 28759567
  89. Chang S-E, Zhu DC. Neural network connectivity differences in children who stutter. *Brain*. 2013; 136:3709–3726. <https://doi.org/10.1093/brain/awt275> PMID: 24131593
  90. Singer CM, Hessling A, Kelly EM, Singer L, Jones RM. Clinical Characteristics Associated With Stuttering Persistence: A Meta-Analysis. *J Speech Lang Hear Res*. 2020; 63:2995–3018. [https://doi.org/10.1044/2020\\_JSLHR-20-00096](https://doi.org/10.1044/2020_JSLHR-20-00096) PMID: 32772868
  91. Walsh B, Christ S, Weber C. Exploring Relationships Among Risk Factors for Persistence in Early Childhood Stuttering. *J Speech Lang Hear Res*. 2021; 64:2909–2927. [https://doi.org/10.1044/2021\\_JSLHR-21-00034](https://doi.org/10.1044/2021_JSLHR-21-00034) PMID: 34260279
  92. Spencer C, Weber-Fox C. Preschool speech articulation and nonword repetition abilities may help predict eventual recovery or persistence of stuttering. *J Fluency Disord*. 2014; 41:32–46. <https://doi.org/10.1016/j.jfludis.2014.06.001> PMID: 25173455
  93. Ambrose NG, Yairi E. Normative Disfluency Data for Early Childhood Stuttering. *J Speech Lang Hear Res*. 1999; 42:895–909. <https://doi.org/10.1044/jslhr.4204.895> PMID: 10450909
  94. Wiestler T, Diedrichsen J. Skill learning strengthens cortical representations of motor sequences. *eLife*. 2013; 2:e00801. <https://doi.org/10.7554/eLife.00801> PMID: 23853714
  95. Chesters J, Möttönen R, Watkins KE. Neural changes after training with transcranial direct current stimulation to increase speech fluency in adults who stutter. 2021. <https://doi.org/10.31219/osf.io/8st3j>
  96. Toyomura A, Fujii T, Kuriki S. Effect of an 8-week practice of externally triggered speech on basal ganglia activity of stuttering and fluent speakers. *Neuroimage*. 2015; 109:458–468. <https://doi.org/10.1016/j.neuroimage.2015.01.024> PMID: 25595501
  97. Maguire GA, Yoo BR, SheikhBahaei S. Investigation of Risperidone Treatment Associated With Enhanced Brain Activity in Patients Who Stutter. *Front Neurosci*. 2021; 15:598949. <https://doi.org/10.3389/fnins.2021.598949> PMID: 33642973
  98. Kell CA, Neumann K, von Kriegstein K, Posenenske C, von Gudenberg AW, Euler H, et al. How the brain repairs stuttering. *Brain*. 2009; 132:2747–2760. <https://doi.org/10.1093/brain/awp185> PMID: 19710179
  99. Lu C, Zheng L, Long Y, Yan Q, Ding G, Liu L, et al. Reorganization of brain function after a short-term behavioral intervention for stuttering. *Brain Lang*. 2017; 168:12–22. <https://doi.org/10.1016/j.bandl.2017.01.001> PMID: 28113105
  100. Neumann K, Euler HA, Wolff von Gudenberg A, Giraud A-L, Lanfermann H, Gall V, et al. The nature and treatment of stuttering as revealed by fMRI A within- and between-group comparison. *J Fluency Disord*. 2003; 28:381–410. <https://doi.org/10.1016/j.jfludis.2003.07.003> PMID: 14643071
  101. Lu C, Chen C, Peng D, You W, Zhang X, Ding G, et al. Neural anomaly and reorganization in speakers who stutter. *Neurology*. 2012; 79:625–632. <https://doi.org/10.1212/wnl.0b013e31826356d2> PMID: 22875083
  102. Korzeczek A, Primaßin A, Wolff von Gudenberg A, Dechent P, Paulus W, Sommer M, et al. Fluency shaping increases integration of the command-to-execution and the auditory-to-motor pathways in persistent developmental stuttering. *Neuroimage*. 2021; 245:118736. <https://doi.org/10.1016/j.neuroimage.2021.118736> PMID: 34798230
  103. Neef NE, Primaßin A, Wolff von Gudenberg A, Dechent P, Riedel HC, Paulus W, et al. Two cortical representations of voice control are differentially involved in speech fluency. *Brain Commun*. 2021; 3:fcaa232. <https://doi.org/10.1093/braincomms/fcaa232> PMID: 33959707
  104. Kawai R, Markman T, Poddar R, Ko R, Fantana AL, Dhawale AK, et al. Motor Cortex Is Required for Learning but Not for Executing a Motor Skill. *Neuron*. 2015; 86:800–812. <https://doi.org/10.1016/j.neuron.2015.03.024> PMID: 25892304
  105. Guenther FH, Vladusich T. A neural theory of speech acquisition and production. *J Neurolinguistics*. 2012; 25:408–422. <https://doi.org/10.1016/j.jneuroling.2009.08.006> PMID: 22711978

106. Masapollo M, Segawa JA, Beal DS, Tourville JA, Nieto-Castañón A, Heyne M, et al. Behavioral and Neural Correlates of Speech Motor Sequence Learning in Stuttering and Neurotypical Speakers: An fMRI Investigation. *Neurobiol Lang.* 2021; 2:106–137. [https://doi.org/10.1162/nol\\_a\\_00027](https://doi.org/10.1162/nol_a_00027) PMID: 34296194
107. Guenther FH. *Neural Control of Speech.* Cambridge: MIT Press; 2016. <https://doi.org/10.7551/mitpress/10471.001.0001>
108. Mizes KGC, Lindsey J, Escola GS, Ölteczky BP. Dissociating the contributions of sensorimotor striatum to automatic and visually guided motor sequences. *Nat Neurosci.* 2023; 26:1791–1804. <https://doi.org/10.1038/s41593-023-01431-3> PMID: 37667040
109. Choi EY, Yeo BTT, Buckner RL. The organization of the human striatum estimated by intrinsic functional connectivity. *J Neurophysiol.* 2012; 108:2242–2263. <https://doi.org/10.1152/jn.00270.2012> PMID: 22832566
110. Wolff SBE, Ko R, Ölteczky BP. Distinct roles for motor cortical and thalamic inputs to striatum during motor skill learning and execution. *Sci Adv.* 2022; 8:eabk0231. <https://doi.org/10.1126/sciadv.abk0231> PMID: 35213216
111. Bohland JW, Bullock D, Guenther FH. Neural Representations and Mechanisms for the Performance of Simple Speech Sequences. *J Cogn Neurosci.* 2010; 22:1504–1529. <https://doi.org/10.1162/jocn.2009.21306> PMID: 19583476
112. Glover H, Kalinowski J, Rastatter M, Stuart A. Effect of Instruction to Sing on Stuttering Frequency at Normal and Fast Rates. *Percept Mot Ski.* 1996; 83:511–522. <https://doi.org/10.2466/pms.1996.83.2.511> PMID: 8902026
113. Healey EC, Mallard AR, Adams MR. Factors Contributing to the Reduction of Stuttering during Singing. *J Speech Lang Hear Res.* 1976; 19:475–480. <https://doi.org/10.1044/jshr.1903.475> PMID: 979210
114. Davidow JH, Bothe AK, Andreatta RD, Ye J. Measurement of Phonated Intervals During Four Fluency-Inducing Conditions. *J Speech Lang Hear Res.* 2009; 52:188–205. [https://doi.org/10.1044/1092-4388\(2008/07-0040\)](https://doi.org/10.1044/1092-4388(2008/07-0040)) PMID: 18664700
115. Andrews G, Howie PM, Dozsa M, Guitar BE. Stuttering: Speech Pattern Characteristics Under Fluency-Inducing Conditions. *J Speech Lang Hear Res.* 1982; 25:208–216. <https://doi.org/10.1044/jshr.2502.208> PMID: 7120960
116. Falk S, Maslow E, Thum G, Hoole P. Temporal variability in sung productions of adolescents who stutter. *J Commun Disord.* 2016; 62:101–114. <https://doi.org/10.1016/j.jcomdis.2016.05.012> PMID: 27323225
117. Zuk J, Loui P, Guenther F. Neural Control of Speaking and Singing: The DIVA Model for Singing. 2022. <https://doi.org/10.31234/osf.io/xqtc9>
118. Zarate JM, Zatorre RJ. Experience-dependent neural substrates involved in vocal pitch regulation during singing. *NeuroImage.* 2008; 40:1871–1887. <https://doi.org/10.1016/j.neuroimage.2008.01.026> PMID: 18343163
119. Harris I, Niven EC, Griffin A, Scott SK. Is song processing distinct and special in the auditory cortex? *Nat Rev Neurosci.* 2023; 24:711–722. <https://doi.org/10.1038/s41583-023-00743-4> PMID: 37783820
120. Hickok G, Venezia J, Teghipco A. Beyond Broca: neural architecture and evolution of a dual motor speech coordination system. *Brain.* 2022; 146:1775–1790. <https://doi.org/10.1093/brain/awac454> PMID: 36746488
121. Dichter BK, Breshears JD, Leonard MK, Chang EF. The Control of Vocal Pitch in Human Laryngeal Motor Cortex. *Cell.* 2018; 174:21–31.e9. <https://doi.org/10.1016/j.cell.2018.05.016> PMID: 29958109
122. Lu J, Li Y, Zhao Z, Liu Y, Zhu Y, Mao Y, et al. Neural control of lexical tone production in human laryngeal motor cortex. *Nat Commun.* 2023; 14:6917. <https://doi.org/10.1038/s41467-023-42175-9> PMID: 37903780
123. Bouchard KE, Mesgarani N, Johnson K, Chang EF. Functional organization of human sensorimotor cortex for speech articulation. *Nature.* 2013; 495:327–332. <https://doi.org/10.1038/nature11911> PMID: 23426266
124. Barlow SM, Andreatta RD, Kahane J. Muscle systems of the vocal tract. In: Barlow SM, editor. *Handbook of clinical speech physiology.* San Diego, London: Singular Publishing Group; 1999. p. 1–99.
125. Eichert N, Papp D, Mars RB, Watkins KE. Mapping Human Laryngeal Motor Cortex during Vocalization. *Cereb Cortex New York N Y.* 1991; 2020(30):6254–6269. <https://doi.org/10.1093/cercor/bhaa182> PMID: 32728706
126. Simonyan K, Ostuni J, Ludlow CL, Horwitz B. Functional But Not Structural Networks of the Human Laryngeal Motor Cortex Show Left Hemispheric Lateralization during Syllable But Not Breathing

- Production. *J Neurosci*. 2009; 29:14912–14923. <https://doi.org/10.1523/JNEUROSCI.4897-09.2009> PMID: 19940187
127. Brown S, Ngan E, Liotti M. A Larynx Area in the Human Motor Cortex. *Cereb Cortex*. 2008; 18:837–845. <https://doi.org/10.1093/cercor/bhm131> PMID: 17652461
  128. Kleber B, Friberg A, Zeitouni A, Zatorre R. Experience-dependent modulation of right anterior insula and sensorimotor regions as a function of noise-masked auditory feedback in singers and nonsingers. *NeuroImage*. 2017; 147:97–110. <https://doi.org/10.1016/j.neuroimage.2016.11.059> PMID: 27916664
  129. Ozker M, Doyle W, Devinsky O, Flinker A. A cortical network processes auditory error signals during human speech production to maintain fluency. *PLoS Biol*. 2022; 20:e3001493. <https://doi.org/10.1371/journal.pbio.3001493> PMID: 35113857
  130. Euler HA, von Gudenberg AW, Jung K, Neumann K. Computergestützte Therapie bei Redeflussstörungen: Die langfristige Wirksamkeit der Kasseler Stottertherapie (KST). *Sprache Stimme Geh R*. 2009; 33:193–202. <https://doi.org/10.1055/s-0029-1242747>
  131. Kumar V, Croxson PL, Simonyan K. Structural Organization of the Laryngeal Motor Cortical Network and Its Implication for Evolution of Speech Production. *J Neurosci*. 2016; 36:4170–4181. <https://doi.org/10.1523/JNEUROSCI.3914-15.2016> PMID: 27076417
  132. Sommer M, Koch MA, Paulus W, Weiller C, Büchel C. Disconnection of speech-relevant brain areas in persistent developmental stuttering. *Lancet*. 2002; 360:380–383. [https://doi.org/10.1016/S0140-6736\(02\)09610-1](https://doi.org/10.1016/S0140-6736(02)09610-1) PMID: 12241779
  133. Büchel C, Sommer M. What Causes Stuttering? *PLoS Biol*. 2004; 2:e46. <https://doi.org/10.1371/journal.pbio.0020046> PMID: 14966540
  134. Shepherd GMG. Corticostriatal connectivity and its role in disease. *Nat Rev Neurosci*. 2013; 14:278–291. <https://doi.org/10.1038/nrn3469> PMID: 23511908
  135. Shepherd GMG, Yamawaki N. Untangling the cortico-thalamo-cortical loop: cellular pieces of a knotty circuit puzzle. *Nat Rev Neurosci*. 2021; 22:389–406. <https://doi.org/10.1038/s41583-021-00459-3> PMID: 33958775
  136. Jackson ES, Miller LR, Warner HJ, Yaruss JS. Adults who stutter do not stutter during private speech. *J Fluency Disord*. 2021; 70:105878. <https://doi.org/10.1016/j.jfludis.2021.105878> PMID: 34534899
  137. Buzsaki G, Bickford R, Ponomareff G, Thal L, Mandel R, Gage F. Nucleus basalis and thalamic control of neocortical activity in the freely moving rat. *J Neurosci*. 1988; 8:4007–4026. <https://doi.org/10.1523/JNEUROSCI.08-11-04007.1988> PMID: 3183710
  138. Jaffe PI, Brainard MS. Acetylcholine acts on songbird premotor circuitry to invigorate vocal output. *eLife*. 2020; 9:e53288. <https://doi.org/10.7554/eLife.53288> PMID: 32425158
  139. Lee S-H, Dan Y. Neuromodulation of Brain States. *Neuron*. 2012; 76:209–222. <https://doi.org/10.1016/j.neuron.2012.09.012> PMID: 23040816
  140. Floresco SB. The Nucleus Accumbens: An Interface Between Cognition, Emotion, and Action. *Annu Rev Psychol*. 2015; 66:25–52. <https://doi.org/10.1146/annurev-psych-010213-115159> PMID: 25251489
  141. Syal S, Finlay BL. Thinking outside the cortex: social motivation in the evolution and development of language. *Dev Sci*. 2011; 14:417–430. <https://doi.org/10.1111/j.1467-7687.2010.00997.x> PMID: 22213910
  142. Piantadosi PT, Yeates DCM, Floresco SB. Cooperative and dissociable involvement of the nucleus accumbens core and shell in the promotion and inhibition of actions during active and inhibitory avoidance. *Neuropharmacology*. 2018; 138:57–71. <https://doi.org/10.1016/j.neuropharm.2018.05.028> PMID: 29800544
  143. Capuzzo G, Floresco SB. Prelimbic and Infralimbic Prefrontal Regulation of Active and Inhibitory Avoidance and Reward-Seeking. *J Neurosci*. 2020; 40:4773–4787. <https://doi.org/10.1523/JNEUROSCI.0414-20.2020> PMID: 32393535
  144. Montag C, Bleek B, Reuter M, Müller T, Weber B, Faber J, et al. Ventral striatum and stuttering: Robust evidence from a case-control study applying DARTEL. *Neuroimage Clin*. 2019; 23:101890. <https://doi.org/10.1016/j.nicl.2019.101890> PMID: 31255948
  145. Janfaza M, Sherman TI, Larmore KA, Brown-Dawson J, Klein KO. Estradiol Levels and Secretory Dynamics in Normal Girls and Boys as Determined by an Ultrasensitive Bioassay: A 10 Year Experience. *J Pediatr Endocrinol Metab*. 2006; 19:901–910. <https://doi.org/10.1515/jpem.2006.19.7.901> PMID: 16995570
  146. Barth C, Villringer A, Sacher J. Sex hormones affect neurotransmitters and shape the adult female brain during hormonal transition periods. *Front Neurosci*. 2015; 9:37. <https://doi.org/10.3389/fnins.2015.00037> PMID: 25750611

147. Brann DW, Dhandapani K, Wakade C, Mahesh VB, Khan MM. Neurotrophic and neuroprotective actions of estrogen: Basic mechanisms and clinical implications. *Steroids*. 2007; 72:381–405. <https://doi.org/10.1016/j.steroids.2007.02.003> PMID: 17379265
148. Davenport MH, Choe HN, Matsunami H, Jarvis ED. Sex chromosome gene expression associated with vocal learning following hormonal manipulation in female zebra finches. *bioRxiv*. 2023;2021.07.12.452102. <https://doi.org/10.1101/2021.07.12.452102>
149. Wermke K, Hain J, Oehler K, Wermke P, Hesse V. Sex hormone influence on human infants' sound characteristics: melody in spontaneous crying. *Biol Lett*. 2014; 10:20140095. <https://doi.org/10.1098/rsbl.2014.0095> PMID: 24806423
150. Jorge A, Lipski WJ, Wang D, Crammond DJ, Turner RS, Richardson RM. Hyperdirect connectivity of opercular speech network to the subthalamic nucleus. *Cell Rep*. 2022; 38:110477. <https://doi.org/10.1016/j.celrep.2022.110477> PMID: 35263607
151. Ladányi E, Persici V, Fiveash A, Tillmann B, Gordon RL. Is atypical rhythm a risk factor for developmental speech and language disorders? *Wiley Interdiscip Rev Cogn Sci*. 2020; 11:e1528. <https://doi.org/10.1002/wcs.1528> PMID: 32244259
152. Below J, Polikowsky H, Scartozzi A, Shaw D, Pruett D, Chen H-H, et al. Discovery of 36 loci significantly associated with stuttering. 2023. <https://doi.org/10.21203/rs.3.rs-2799926/v1>
